# Supplementary material for: Self-supported hierarchical CuOx@Co3O4heterostructures as efficient bifunctional electrocatalysts for water splitting
Source: Royal Society of Chemistry journal article supplement (doi:10.1039/c8ta03120g), 2018-01-01
Supplement: c8ta03120g1.pdf [file c8ta03120g1.pdf]

## electronic supplementary information for

### Self-Supported Hierarchical $\text{CuO}_x@ \text{Co}_3\text{O}_4$ Heterostructures as Efficient Bifunctional Electrocatalyst for Water Splitting

*Qianqian Zhou,<sup>a</sup> Ting-Ting Li,<sup>\*,a</sup> Jinjie Qian,<sup>b</sup> Yue Hu,<sup>b</sup> Fenya Guo,<sup>a</sup> Yue-Qing Zheng<sup>\*,a</sup>*

*<sup>a</sup>Research Center of Applied Solid State Chemistry, Chemistry Institute for Synthesis and Green Application, Ningbo University, 818 Fenghua Road, Ningbo, Zhejiang Province, 315211, P. R. China.*

*<sup>b</sup>College of Chemistry and Materials Engineering, Wenzhou University, Wenzhou, 325035, P. R. China.*

*Corresponding Author\**

*Tel: +86-574-87600792*

*Email: litingting@nbu.edu.cn (T.-T. Li); zhengyueqing@nbu.edu.cn (Y.-Q. Zheng).*

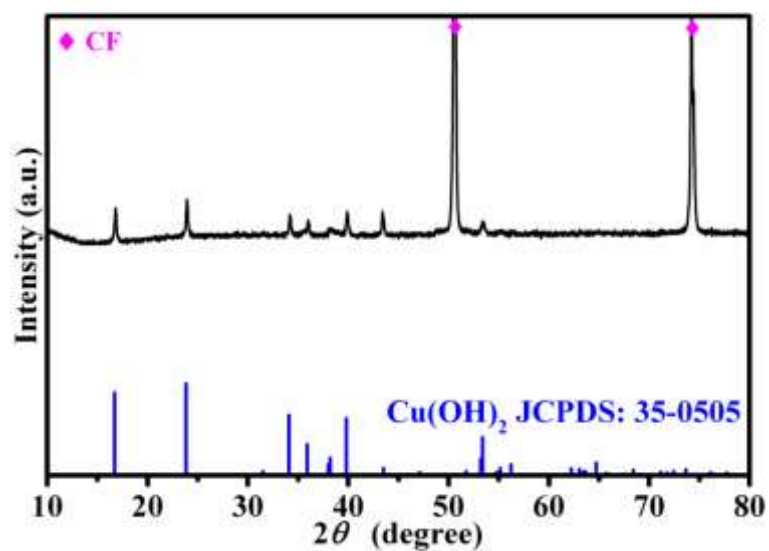

Fig. S1 XRD pattern of Cu(OH)<sub>2</sub> NRs/CF.

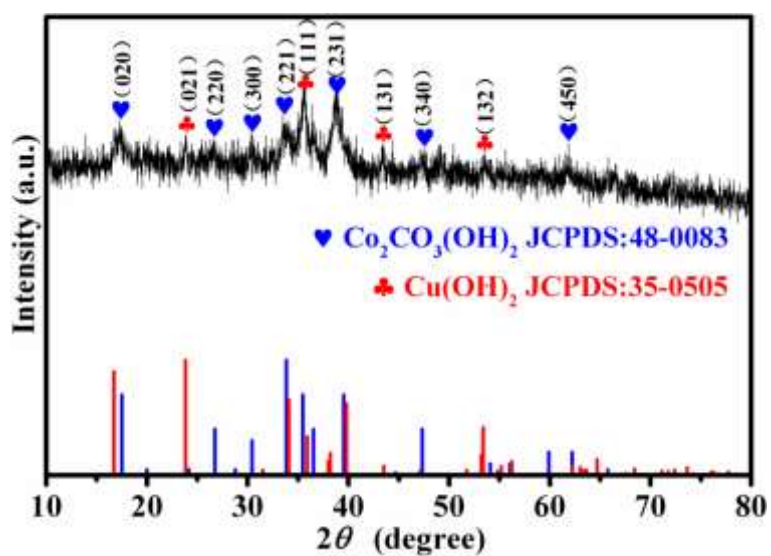

Fig. S2 XRD pattern of Cu(OH)<sub>2</sub>@Co<sub>2</sub>CO<sub>3</sub>(OH)<sub>2</sub> NRs scraped off from the CF substrate.

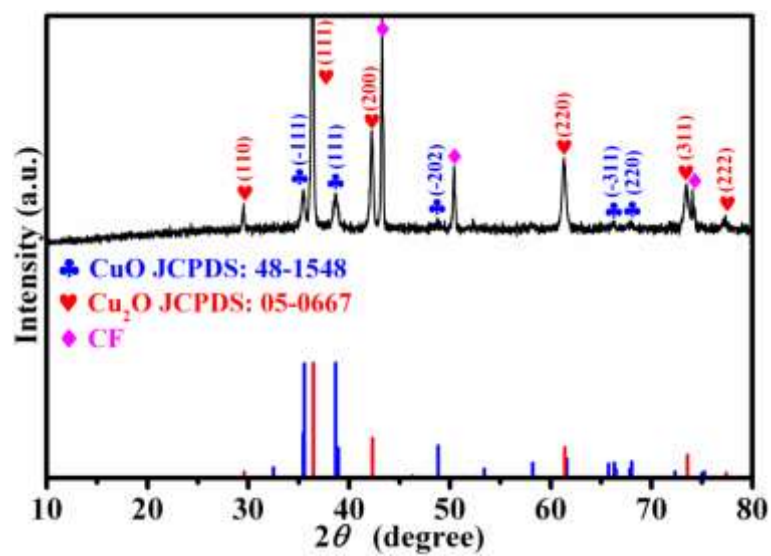

Fig. S3 XRD pattern of CuO<sub>x</sub> NRs/CF.

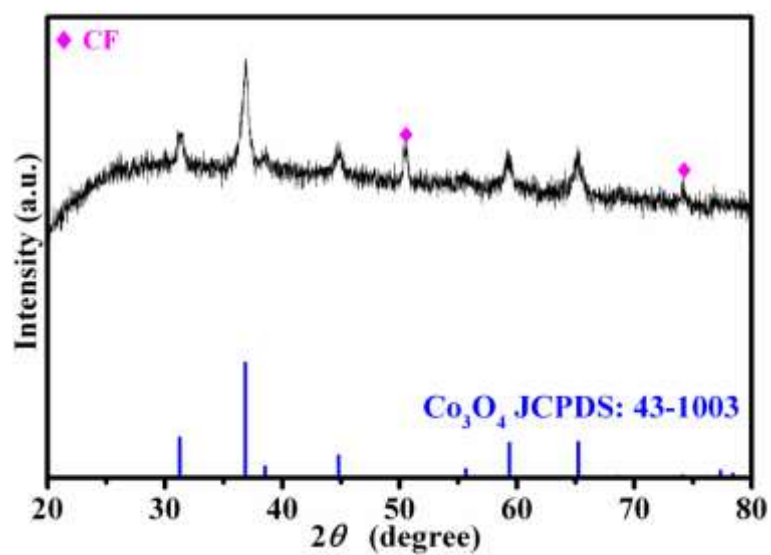

Fig. S4 The XRD pattern of Co<sub>3</sub>O<sub>4</sub>/CF.

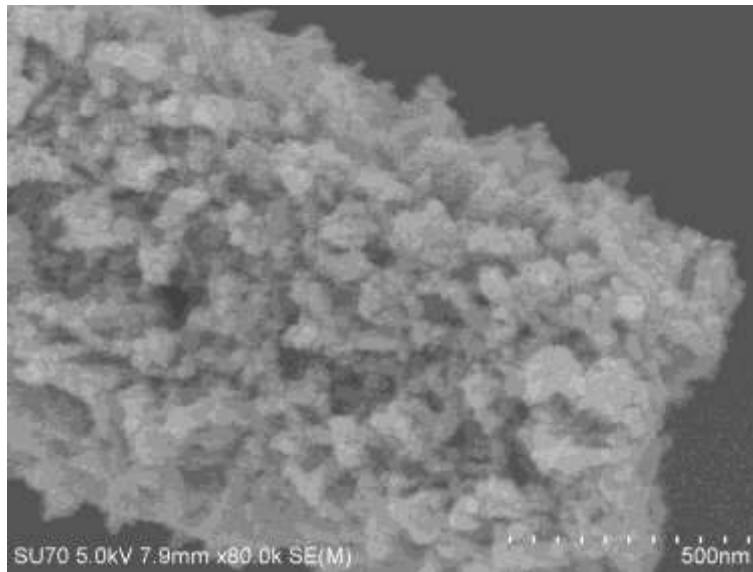

**Fig. S5** Partial magnified SEM image of  $\text{CuO}_x@ \text{Co}_3\text{O}_4$  NRs.

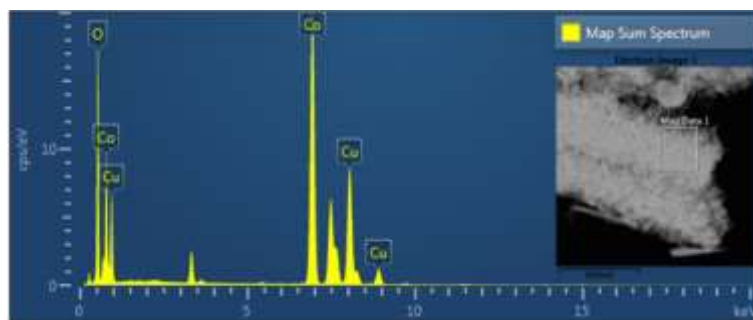

**Fig. S6** The EDX spectrum of  $\text{CuO}_x@ \text{Co}_3\text{O}_4$  NRs.

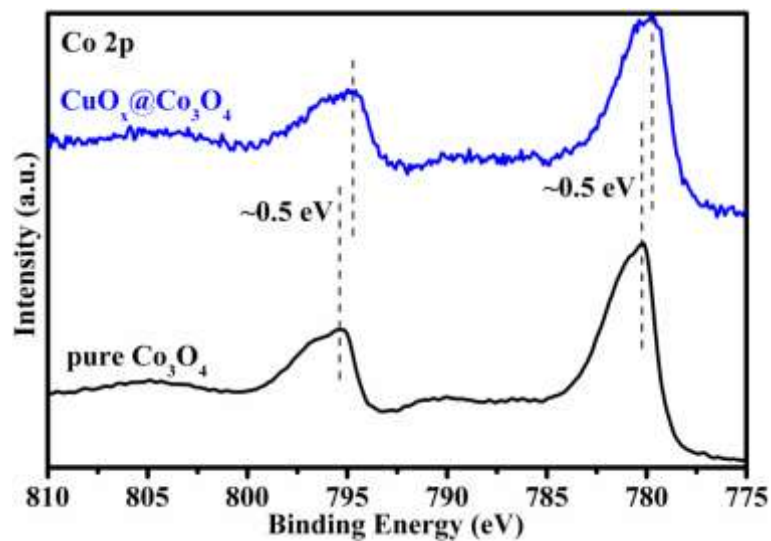

**Fig. S7** High resolution XPS spectra for Co 2p regions in  $\text{CuO}_x@ \text{Co}_3\text{O}_4$  NRs/CF (blue line) and pure  $\text{Co}_3\text{O}_4$  (black line).

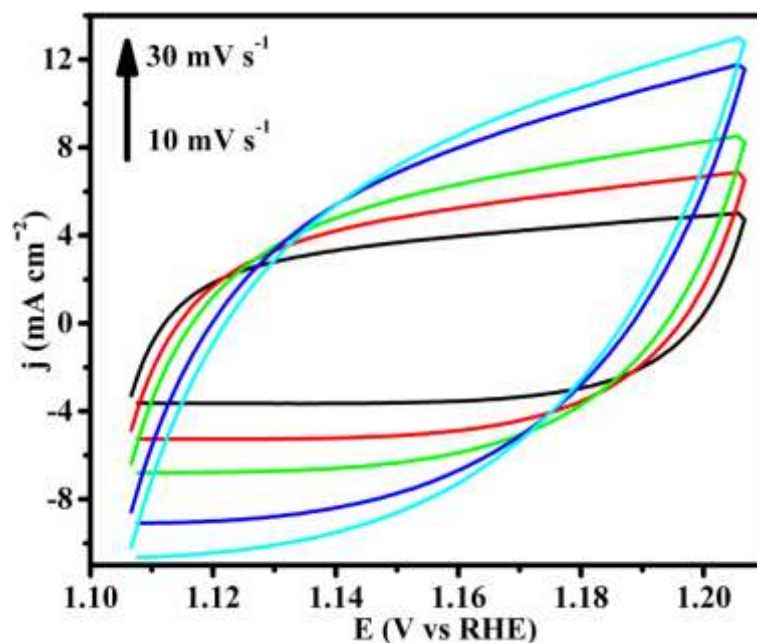

**Fig. S8** CV scans for  $\text{CuO}_x@ \text{Co}_3\text{O}_4$  NRs/CF under various scan rates (10 to  $30 \text{ mV s}^{-1}$ ) in the non-Faradaic potential range (0.10 ~ 0.20 V vs Ag/AgCl).

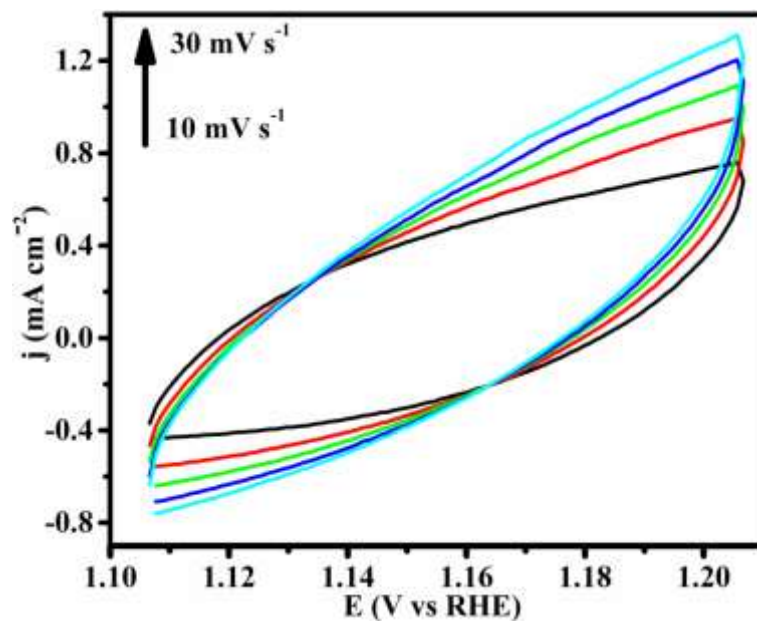

**Fig. S9** CV scans for CuO<sub>x</sub> NRs/CF under various scan rates (10 to 30 mV s<sup>-1</sup>) in the non-Faradaic potential range (0.10 ~ 0.20 V vs Ag/AgCl).

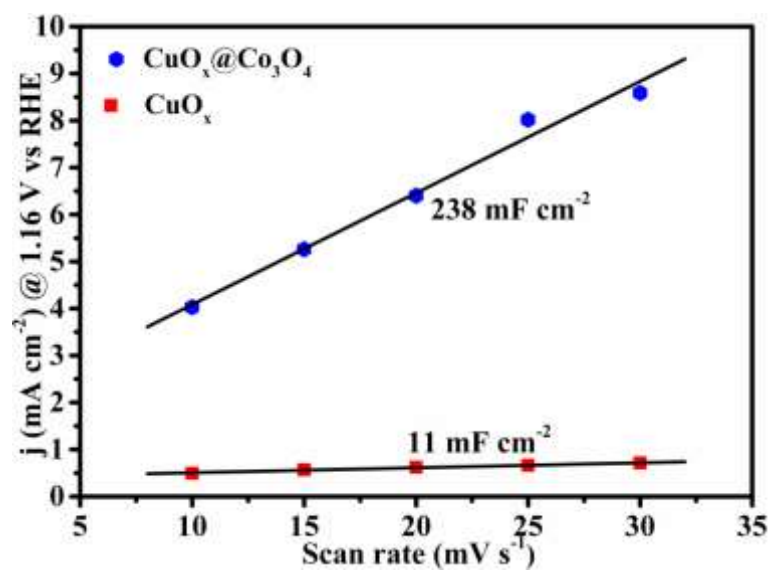

**Fig. S10** C<sub>dl</sub> plot for CuO<sub>x</sub>@Co<sub>3</sub>O<sub>4</sub> NRs/CF and CuO<sub>x</sub> NRs/CF derived from current densities at 1.16 V vs RHE against the scan rates.

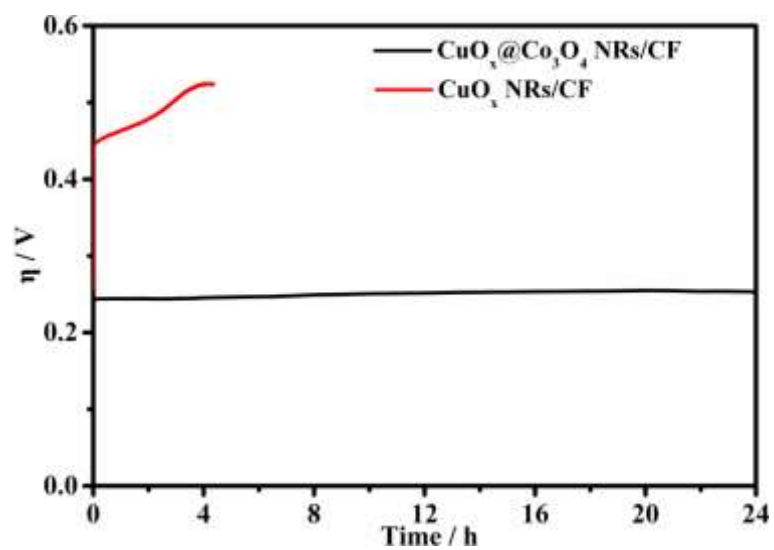

**Fig. S11** Chronopotentiometry for CuO<sub>x</sub>@Co<sub>3</sub>O<sub>4</sub> NRs/CF and CuO<sub>x</sub> NRs/CF fixed at a current density of 50 mA cm<sup>-2</sup> in 1.0 M KOH solution.

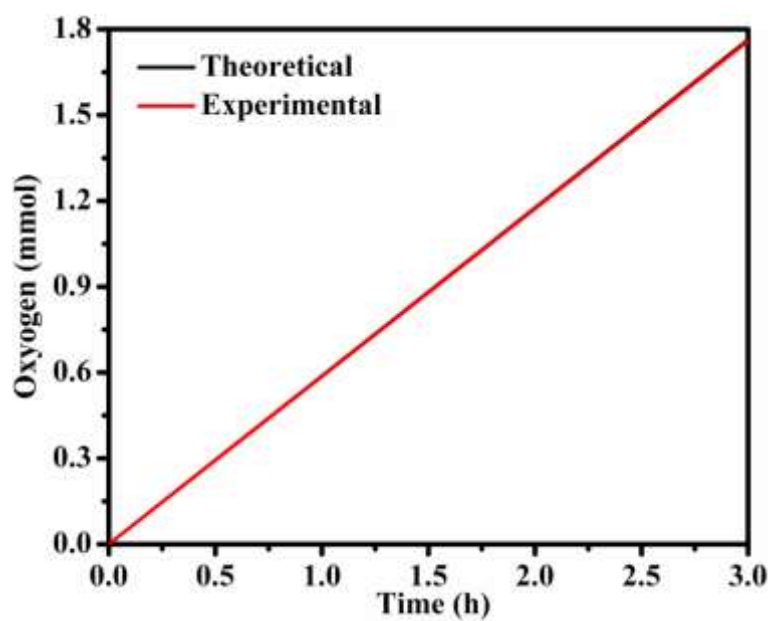

**Fig. S12** The amount of theoretically calculated and experimentally measured O<sub>2</sub> versus the electrolysis time for CuO<sub>x</sub>@Co<sub>3</sub>O<sub>4</sub> NRs/CF.

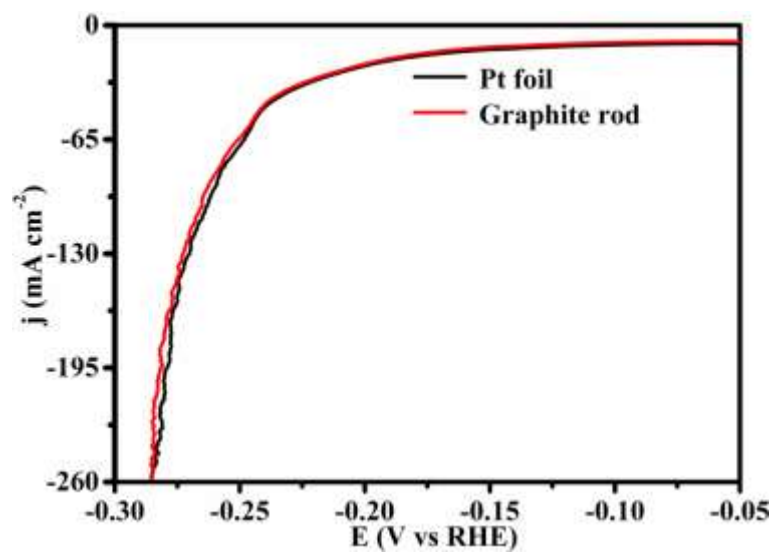

**Fig. S13** Polarization plots of CuO<sub>x</sub>@Co<sub>3</sub>O<sub>4</sub> NRs/CF for HER by using Pt foil or graphite rod as the counter electrode, respectively.

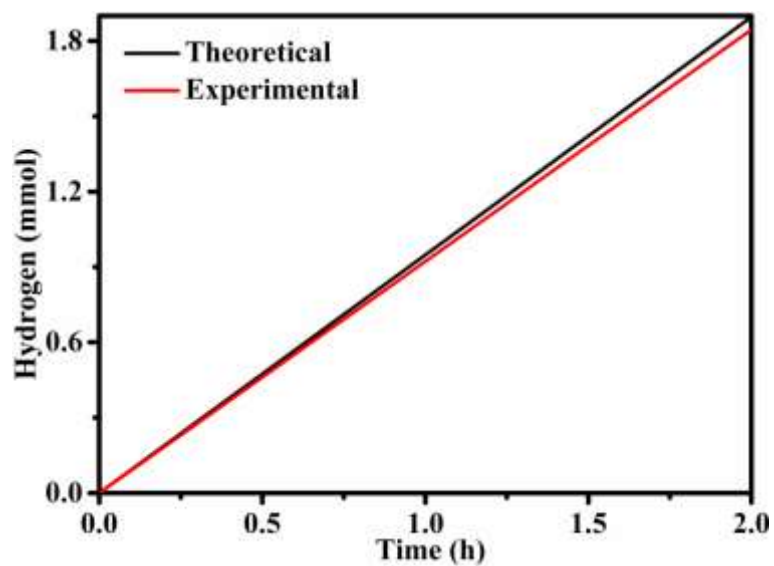

**Fig. S14** The amount of theoretically calculated and experimentally measured H<sub>2</sub> versus the electrolysis time for CuO<sub>x</sub>@Co<sub>3</sub>O<sub>4</sub> NRs/CF.



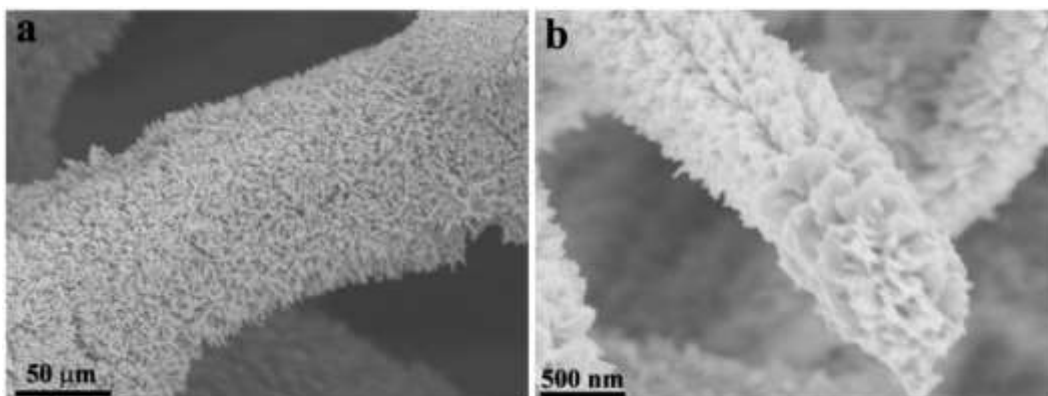

**Fig. S15** The SEM images of  $\text{CuO}_x@ \text{Co}_3\text{O}_4$  NRs/CF after 24 h OER.

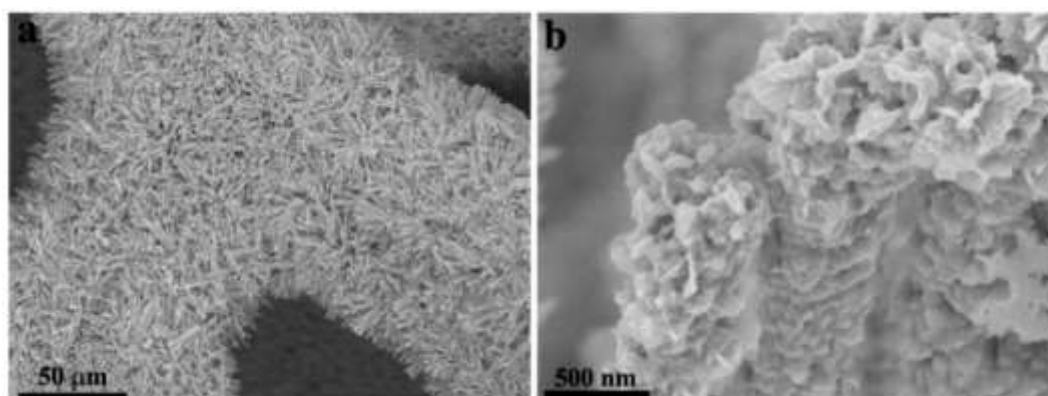

**Fig. S16** The SEM images of  $\text{CuO}_x@ \text{Co}_3\text{O}_4$  NRs/CF after 24 h HER.

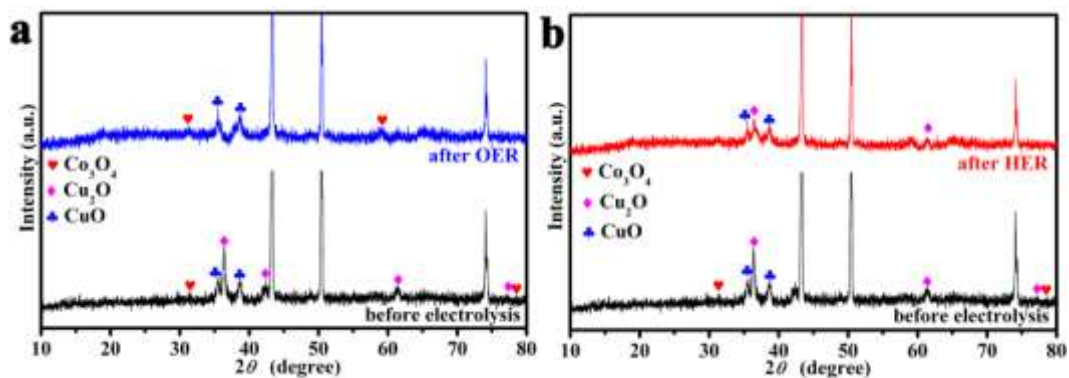

**Fig. S17** The comparison of XRD patterns for  $\text{CuO}_x@ \text{Co}_3\text{O}_4$  NRs/CF before and after 24 h OER and HER.

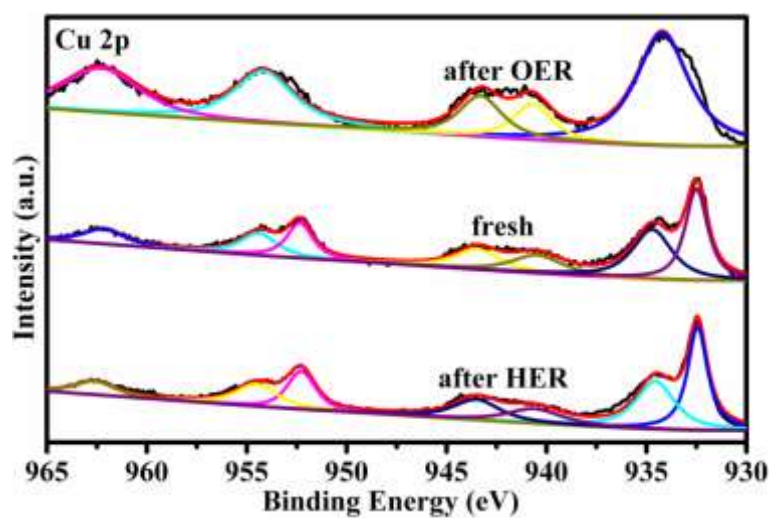

**Fig. S18** The comparison of high resolution XPS spectra of Cu 2p before and after 24 h OER and HER.

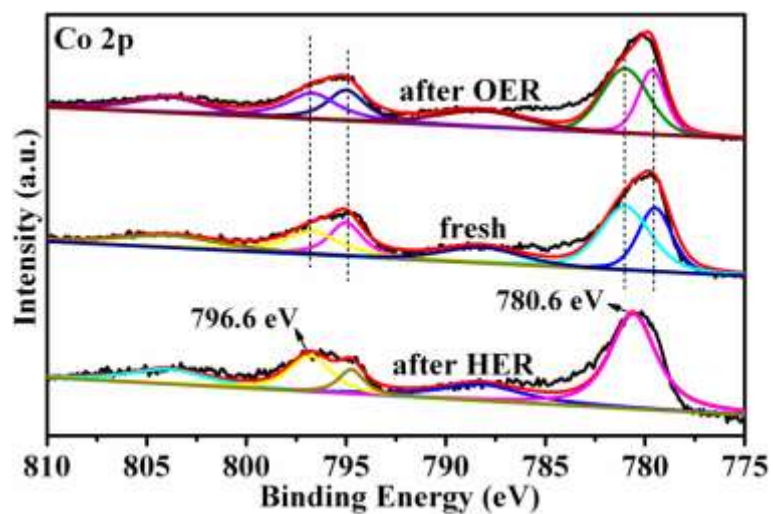

**Fig. S19** The comparison of high resolution XPS spectra of Co 2p before and after 24 h OER and HER.

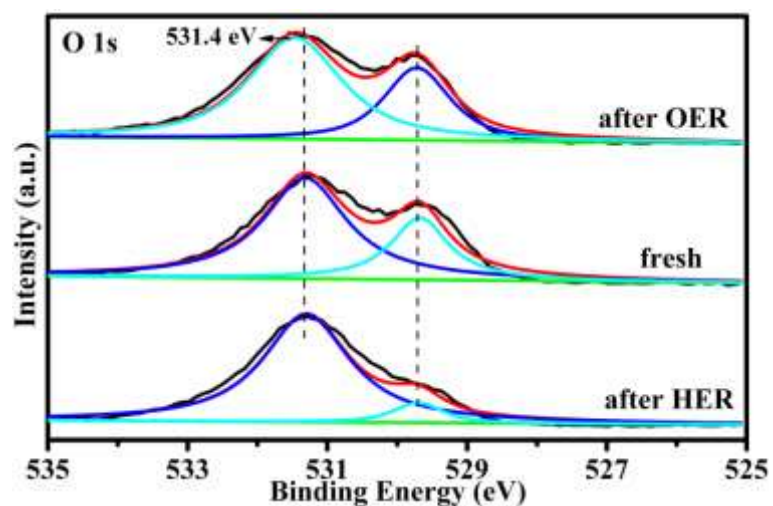

**Fig. S20** The comparison of high resolution XPS spectra of O 1s before and after 24 h OER and HER.

**Table S1.** Comparison of OER activity from different catalysts.

| Sample                                                    | electrolyte    | j<br>(mA cm <sup>-2</sup> ) | η<br>(mV)  | Tafel slope<br>(mV dec <sup>-1</sup> ) | Reference        |
|-----------------------------------------------------------|----------------|-----------------------------|------------|----------------------------------------|------------------|
| <b>CuO<sub>x</sub>@Co<sub>3</sub>O<sub>4</sub> NRs/CF</b> | <b>1 M KOH</b> | <b>50</b>                   | <b>240</b> | <b>46</b>                              | <b>This work</b> |
| CuO/Co <sub>3</sub> O <sub>4</sub>                        | 1 M KOH        | 10                          | 227        | –                                      | S1               |
| CuO/Fe-Co <sub>3</sub> O <sub>4</sub>                     | 1 M KOH        | 10                          | 232        | –                                      | S2               |
| Cu/Cu <sub>2</sub> O/CuO                                  | 1 M NaOH       | 10                          | 290        | 64                                     | S3               |
| Fe(OH) <sub>3</sub> :Cu(OH) <sub>2</sub>                  | 1 M KOH        | 10                          | 365        | 42                                     | S4               |
| CuO nanosheet bundles                                     | 1 M KOH        | 10                          | 350        | 59                                     | S5               |
| Cu(OH) <sub>2</sub> @NiFe-LDH                             | 1 M KOH        | 10                          | 283        | 88                                     | S6               |
| Annealed CuO                                              | 1 M KOH        | 1.0                         | 430        | 61.4                                   | S7               |
| NiFeO <sub>x</sub> /CuO                                   | 1 M KOH        | 100                         | 300        | 36                                     | S8               |
| NiFe/Cu <sub>2</sub> O NWs/CF                             | 1 M KOH        | 10                          | 215        | 42                                     | S9               |
| MWCNT-CuO-400                                             | 1 M KOH        | 10                          | 420        | 59.9                                   | S10              |
| CuO-TCNQ/CF                                               | 1 M KOH        | 25                          | 317        | 85                                     | S11              |
| CuO nanowire@Co <sub>3</sub> O <sub>4</sub><br>nanosheet  | 1 M KOH        | 10                          | ~258       | 72                                     | S13              |
| CuO NSDs/CF                                               | 1 M KOH        | 10                          | 370        | 41                                     | S14              |
| NiFe-LDH/CuO NRs/CF                                       | 1 M KOH        | 50                          | 290        | 60                                     | S15              |

**Table S2.** Comparison of HER activity from different catalysts.

| Sample                                                    | electrolyte    | j<br>(mA cm <sup>-2</sup> ) | η<br>(mV)  | Tafel slope<br>(mV dec <sup>-1</sup> ) | Reference        |
|-----------------------------------------------------------|----------------|-----------------------------|------------|----------------------------------------|------------------|
| <b>CuO<sub>x</sub>@Co<sub>3</sub>O<sub>4</sub> NRs/CF</b> | <b>1 M KOH</b> | <b>50</b>                   | <b>242</b> | <b>69</b>                              | <b>This work</b> |
| Cu <sub>0.3</sub> Co <sub>2.7</sub> P/NC                  | 1 M KOH        | 10                          | 220        | 122                                    | S16              |
| Cu <sub>3</sub> P/CF                                      | 1 M KOH        | 20                          | 447        | 124                                    | S17              |
| Cu NDs/Ni <sub>3</sub> S <sub>2</sub> NTs-CFs             | 1 M KOH        | 10                          | 128        | 76.2                                   | S18              |
| Cu@NC NT/CF                                               | 1 M KOH        | 10                          | 123        | 63                                     | S19              |
| Cu@CoFe                                                   | 1 M KOH        | 10                          | 171        | 36.4                                   | S20              |
| Co <sub>2</sub> B/CoSe <sub>2</sub>                       | 1 M KOH        | 10                          | 300        | 76                                     | S21              |
| NiFe-NCs                                                  | 1 M KOH        | 10                          | 197        | 130                                    | S22              |
| NiFeOF                                                    | 1 M NaOH       | 10                          | 253        | 96                                     | S23              |

## Reference

- [S1] X. Li, G. Guan, X. Du, J. Cao, X. Hao, X. Ma, A.D. Jagdale and A. Abudula, *Chem. Commun.*, 2015, **51**, 15012–15014.
- [S2] X. Li, C. Li, A. Yoshida, X. Hao, Z. Zuo, Z. Wang, A. Abudula and G. Guan, *J. Mater. Chem. A*, 2017, **5**, 21740–21749.
- [S3] T. N. Huan, G. Rousse, S. Zanna, I. T. Lucas, X. Xu, N. Menguy, V. Mougél and M. Fontecave, *Angew. Chem. Int. Ed.*, 2017, **56**, 4792–4796.
- [S4] C. C. Hou, C. J. Wang, Q. Q. Chen, X. J. Lv, W. F. Fu and Y. Chen, *Chem. Commun.*, 2016, **52**, 14470–14473.
- [S5] N. Cheng, Y. Xue, Q. Liu, J. Tian, L. Zhang, A.M. Asiri, X. Sun, *Electrochim. Acta*, 2015, **163**, 102–106.
- [S6] X. Ma, X. Li, A. D. Jagdale, X. Hao, A. Abudula and G. Guan, *Int. J. Hydrogen Energy*, 2016, **41**, 14553–14561.
- [S7] X. Liu, S. Cui, Z. Sun, Y. Ren, X. Zhang and P. Du, *J. Phys. Chem. C*, 2016, **120**, 831–840.
- [S8] S. Czioska, J. Wang, S. Zuo, X. Teng and Z. Chen, *ChemCatChem*, 2018, **10**, 1005–1011.
- [S9] H. Chen, Y. Gao and L. Sun, *ChemSusChem*, 2017, **10**, 1475–1481.
- [S10] A. Chinnappan, D. Ji, C. Baskar, X. Qin and S. Ramakrishna, *J. Alloys Compd.*, 2018, **735**, 2311–2317.
- [S11] X. Ren, X. Ji, Y. Wei, D. Wu, Y. Zhang, M. Ma, Z. Liu, A. M. Asiri, Q. Wei and X. Sun, *Chem. Commun.*, 2018, **54**, 1425–1428.
- [S13] X. Li, X. Du, X. Ma, Z. Wang, X. Hao, A. Abudula, A. Yoshida and G. Guan, *Electrochim. Acta*, 2017, **250**, 77–83.
- [S14] Q. Zhou, T.-T. Li, W. Xu, H.-L. Zhu and Y.-Q. Zheng, *J Mater Sci.*, 2018, **53**, 8141–8150.
- [S15] Q. Zhou, T.-T. Li, J. Qian, W. Xu, Y. Hu and Y.-Q. Zheng, *ACS Appl. Energy Mater.*, 2018, **1**, 1364–1373.
- [S16] J. Song, C. Zhu, B.Z. Xu, S. Fu, M. H. Engelhard, R. Ye, D. Du, S. P. Beckman and Y. Lin, *Adv. Energy Mater.*, 2017, **7**, 1601555.
- [S17] C. Lu, J. Wang, S. Czioska, H. Dong and Z. Chen, *J. Phys. Chem. C*, 2017, **121**, 25875–25881.

- [S18] J.-X. Feng, J.-Q. Wu, Y.-X. Tong and G.-R. Li, *J. Am. Chem. Soc.*, 2018, **140**, 610–617.
- [S19] Y. Zhang, Y. Ma, Y.-Y. Chen, L. Zhao, L.-B. Huang, H. Luo, W.-J. Jiang, X. Zhang, S. Niu, D. Gao, J. Bi, G. Fan and J.-S. Hu, *ACS Appl. Mater. Interfaces*, 2017, **9**, 36857–36864.
- [S20] L. Yu, H. Zhou, J. Sun, F. Qin, D. Luo, L. Xie, F. Yu, J. Bao, Y. Li, Y. Yu, S. Chen and Z. Ren, *Nano Energy*, 2017, **41**, 327–336.
- [S21] Y. Guo, Z. Yao, C. Shang and E. Wang, *ACS Appl. Mater. Interfaces*, 2017, **9**, 39312–39317.
- [S22] A. Kumar and S. Bhattacharyya, *ACS Appl. Mater. Interfaces*, 2017, **9**, 41906–41915.
- [S23] K. Liang, L. Guo, K. Marcus, S. Zhang, Z. Yang, D. E. Perea, L. Zhou, Y. Du and Y. Yang, *ACS Catal.*, 2017, **7**, 8406–8412.
